# Supplementary material for: Anti-swelling hydrogels based on surfactant–polymer interactions for underwater sensing with excellent mechanical properties
Source: Royal Society of Chemistry journal article supplement (doi:10.1039/d3tc01889j), 2023-01-01
Supplement: d3tc01889j1.pdf [file d3tc01889j1.pdf]

## Anti-swelling hydrogels based on surfactant-polymer interactions for underwater sensing with excellent mechanical properties

Yue Cai<sup>a,b</sup>, Kaizhen Wan<sup>a,b</sup>, Qihui Chen<sup>b,c</sup>, Maochun Hong<sup>b,c</sup>, Zhaoxi Zhou<sup>\*d</sup>, Heqing Fu<sup>\*b,c,d</sup>.

(<sup>a</sup> College of Chemistry and Materials Science, Fujian Normal University, Fuzhou 350007, P.R. China; <sup>b</sup> State Key Laboratory of Structural Chemistry, Fujian Institute of Research on the Structure of Matter, Chinese Academy of Sciences, Fuzhou, Fujian 350002, P.R. China; <sup>c</sup> Fujian Science & Technology Innovation Laboratory for Optoelectronic Information of China, Fuzhou, Fujian 350108, P. R. China.); <sup>d</sup> School of Chemistry and Chemical Engineering, South China University of Technology, Guangzhou 510640, P.R. China;

\*Corresponding author. Tel: +86 020 87114919; fax: +86 020 87112047.

E-mail address:

[zhouzx@hotmail.com](mailto:zhouzx@hotmail.com) (Z. Zhou)

[fuhq@scut.edu.cn](mailto:fuhq@scut.edu.cn) (H. Fu)

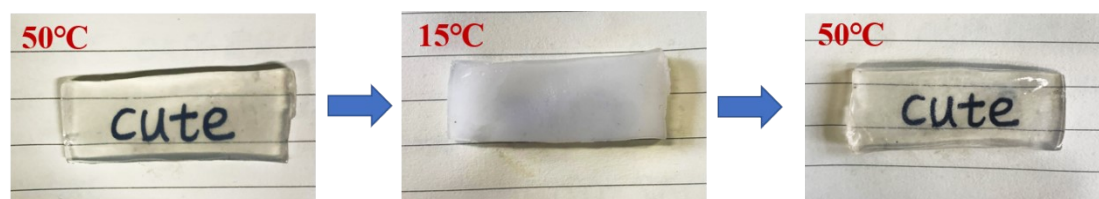

**Figure S1.** Transparent/opaque state of P(AA-SMA)-CMC-Na hydrogels at different temperatures.

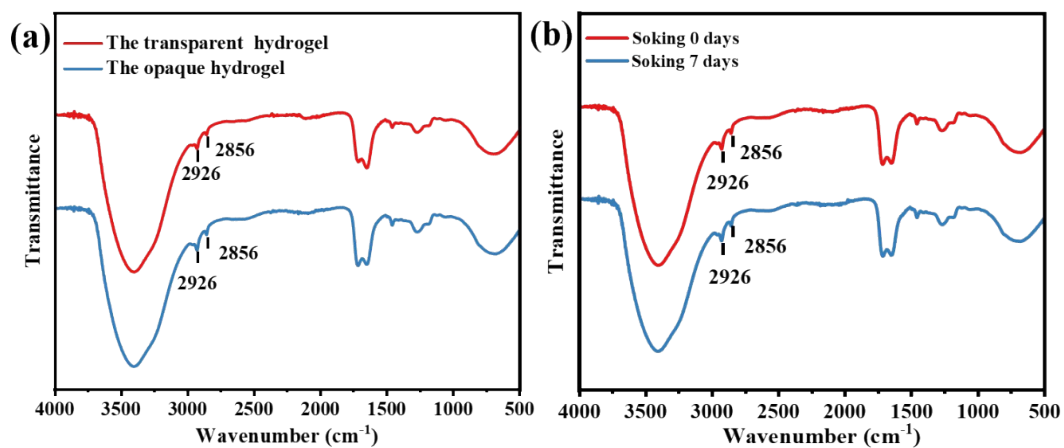

**Figure S2.** FTIR spectra of (a)transparent and opaque P(AA-SMA)-CMC-Na hydrogels,(b)freshly prepared hydrogel P(AA-SMA)-CMC-Na and P(AA-SMA)-CMC-Na hydrogel after soaking in water for seven days.

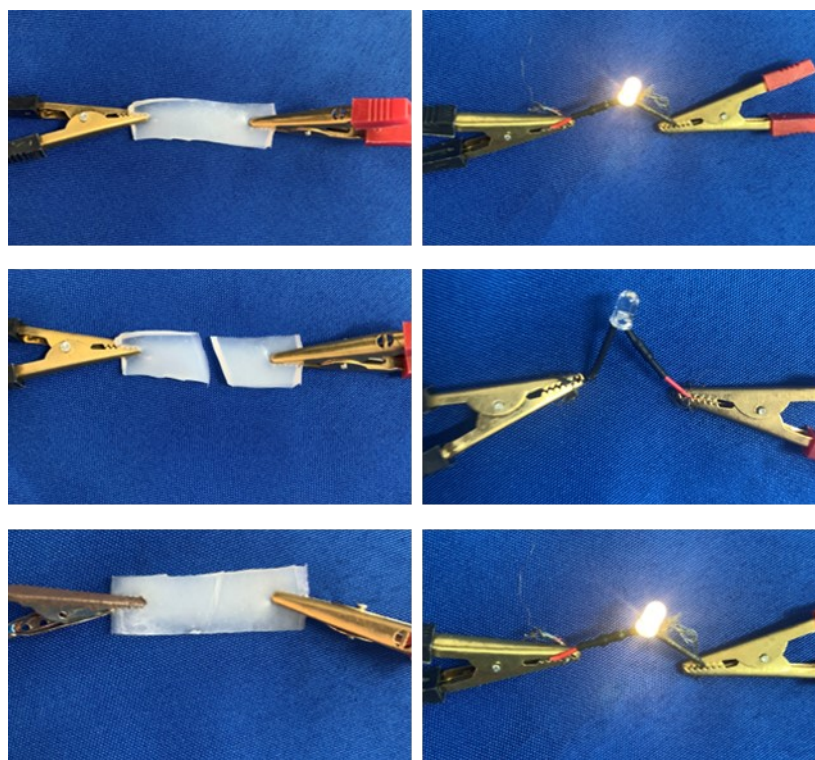

**Figure S3.** Self-repair of the conductive properties of P(AA-SMA)-CMC-Na hydrogels.

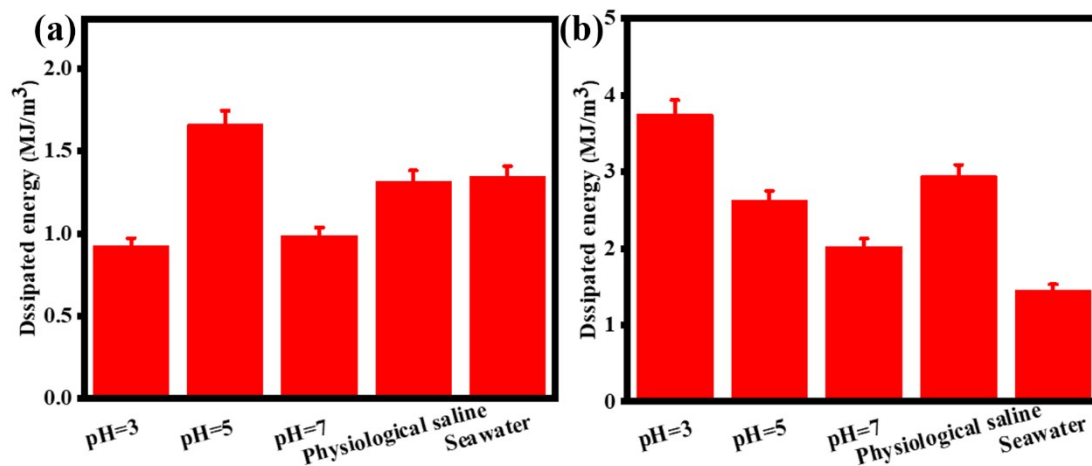

**Figure S4.** Toughness of P(AA-SMA)-CMC-Na hydrogels. (a) After one day of immersion in different solutions and (b) after 7 days of immersion.

**Table S1.** Status of mechanical properties of hydrogels after seven days of immersion in H<sub>2</sub>O or saline.

| Samples                    | Stress increase | Strain increase |
|----------------------------|-----------------|-----------------|
| DN-FT-HCl <sup>1</sup>     | no              | no              |
| PU-5 <sup>2</sup>          | no              | no              |
| P(AA-MEA)-CS <sup>3</sup>  | yes             | no              |
| HP(AAm/AA)-CS <sup>4</sup> | yes             | no              |
| NC-G40 <sup>5</sup>        | yes             | no              |
| This work                  | yes             | yes             |

## References

1. J. Ren, Y. Liu, Z. Wang, S. Chen, Y. Ma, H. Wei and S. Lü, *Adv. Funct. Mater.*, 2021, 32, 2107404.
2. C. Wang, Y. Luo, X. Cao, B. Li and Z. Luo, *Polymer*, 2021, 233, 124213.
3. Z. Zhao, X. Qin, L. Cao, J. Li and Y. Wei, *Int. J. Biol. Macromol.*, 2022, 212, 123-133.
4. J. Xu, R. Jin, X. Ren and G. Gao, *J. Mater. Chem. A*, 2019, 7, 25441-25448.
5. B. Xu, Y. Liu, L. Wang, X. Ge, M. Fu, P. Wang and Q. Wang, *Polymers*, 2018, 10, 1025
